# Supplementary material for: Nile Tilapia Derived TP4 Shows Broad Cytotoxicity toward to Non-Small-Cell Lung Cancer Cells
Source: PubMed Central journal article supplement (PMC6316113; doi:10.3390/md16120506), 2018-12-13

## Supplementary Files

### **Nile tilapia derived TP4 shows broad cytotoxicity toward to non-small-cell lung cancer cells.**

Chen-Hung Ting<sup>1</sup>, Jyh-Yih Chen<sup>1\*</sup>

1. Marine Research Station, Institute of Cellular and Organismic Biology, Academia Sinica, 23-10 Dahuen Road, Jiaushi, Ilan 262, Taiwan

\* Corresponding author: Dr. Jyh-Yih Chen, Marine Research Station, Institute of Cellular and Organismic Biology, Academia Sinica, 23-10 Dahuen Road, Jiaushi, Ilan 262, Taiwan.

Tel: 886-920802111

Fax: 886-39871035

E-mail: [zoocjy@gate.sinica.edu.tw](mailto:zoocjy@gate.sinica.edu.tw)

## Supplementary Table

Supplementary Table S1. TP4 toxicity in normal BEAS-2B and MRC-5 cells was

| Dose           | 0.84                     | 1.68                     | 3.35                     | 5.03                     | 6.71                     | 13.42                    | 20.12 (μM)               |
|----------------|--------------------------|--------------------------|--------------------------|--------------------------|--------------------------|--------------------------|--------------------------|
| <b>BEAS-2B</b> |                          |                          |                          |                          |                          |                          |                          |
| 3hr            | 1.07±0.09 <sup>ns</sup>  | 0.93±0.09 <sup>ns</sup>  | 0.72±0.07 <sup>***</sup> | 0.75±0.09 <sup>***</sup> | 0.69±0.05 <sup>***</sup> | 0.24±0.20 <sup>***</sup> | 0.05±0.01 <sup>***</sup> |
| 6hr            | 0.99±0.10 <sup>ns</sup>  | 1.06±0.07 <sup>ns</sup>  | 1.03±0.05 <sup>ns</sup>  | 0.96±0.13 <sup>ns</sup>  | 0.79±0.11 <sup>***</sup> | 0.11±0.03 <sup>***</sup> | 0.10±0.23 <sup>***</sup> |
| 12hr           | 1.20±0.11 <sup>***</sup> | 1.36±0.13 <sup>***</sup> | 1.46±0.30 <sup>***</sup> | 1.22±0.17 <sup>***</sup> | 1.16±0.23 <sup>*</sup>   | 0.25±0.10 <sup>***</sup> | 0.03±0.01 <sup>***</sup> |
| 24hr           | 1.49±0.08 <sup>***</sup> | 1.58±0.12 <sup>***</sup> | 1.48±0.21 <sup>***</sup> | 1.38±0.23 <sup>***</sup> | 1.48±0.21 <sup>***</sup> | 0.16±0.07 <sup>***</sup> | 0.20±0.48 <sup>***</sup> |
| <b>MRC-5</b>   |                          |                          |                          |                          |                          |                          |                          |
| 3hr            | 1.01±0.07 <sup>ns</sup>  | 0.99±0.06 <sup>ns</sup>  | 0.96±0.12 <sup>ns</sup>  | 0.84±0.07 <sup>***</sup> | 0.84±0.07 <sup>***</sup> | 0.65±0.12 <sup>***</sup> | 0.51±0.09 <sup>***</sup> |
| 6hr            | 1.02±0.06 <sup>ns</sup>  | 1.01±0.04 <sup>ns</sup>  | 0.85±0.09 <sup>**</sup>  | 0.94±0.09 <sup>ns</sup>  | 0.94±0.09 <sup>ns</sup>  | 0.45±0.25 <sup>***</sup> | 0.31±0.20 <sup>***</sup> |
| 12hr           | 1.18±0.11 <sup>***</sup> | 1.17±0.13 <sup>**</sup>  | 1.12±0.18 <sup>ns</sup>  | 1.07±0.15 <sup>ns</sup>  | 1.07±0.15 <sup>ns</sup>  | 0.24±0.22 <sup>***</sup> | 0.11±0.07 <sup>***</sup> |
| 24hr           | 1.08±0.11 <sup>ns</sup>  | 1.13±0.12 <sup>***</sup> | 1.08±0.11 <sup>ns</sup>  | 0.91±0.11 <sup>*</sup>   | 0.91±0.11 <sup>*</sup>   | 0.12±0.02 <sup>***</sup> | 0.05±0.02 <sup>***</sup> |

**Supplementary Table S2.**

| <b>Dose</b>          | <b>0.84</b>              | <b>1.68</b>              | <b>3.35</b>              | <b>5.03</b>              | <b>6.71</b>              | <b>13.42</b>              | <b>20.12 (μM)</b>        |
|----------------------|--------------------------|--------------------------|--------------------------|--------------------------|--------------------------|---------------------------|--------------------------|
| <b><u>A549</u></b>   |                          |                          |                          |                          |                          |                           |                          |
| 3hr                  | 1.12±0.12 <sup>ns</sup>  | 0.86±0.22 <sup>ns</sup>  | 0.85±0.10 <sup>ns</sup>  | 0.74±0.30 <sup>***</sup> | 0.70±0.20 <sup>***</sup> | 0.06±0.04 <sup>***</sup>  | 0.04±0.04 <sup>***</sup> |
| 6hr                  | 1.00±0.07 <sup>ns</sup>  | 0.92±0.07 <sup>ns</sup>  | 0.77±0.17 <sup>***</sup> | 0.67±0.14 <sup>***</sup> | 0.51±0.22 <sup>***</sup> | 0.281±0.17 <sup>***</sup> | 0.02±0.02 <sup>***</sup> |
| 12hr                 | 1.03±0.06 <sup>ns</sup>  | 1.04±0.09 <sup>ns</sup>  | 0.62±0.08 <sup>***</sup> | 0.41±0.14 <sup>***</sup> | 0.28±0.12 <sup>*</sup>   | 0.15±0.15 <sup>***</sup>  | 0.00±0.00 <sup>***</sup> |
| 24hr                 | 1.15±0.08 <sup>***</sup> | 0.99±0.07 <sup>ns</sup>  | 0.50±0.09 <sup>***</sup> | 0.20±0.08 <sup>***</sup> | 0.17±0.07 <sup>***</sup> | 0.00±0.00 <sup>***</sup>  | 0.00±0.00 <sup>***</sup> |
| <b><u>H661</u></b>   |                          |                          |                          |                          |                          |                           |                          |
| 3hr                  | 1.10±0.10 <sup>ns</sup>  | 1.01±0.11 <sup>ns</sup>  | 0.88±0.11 <sup>ns</sup>  | 0.59±0.07 <sup>***</sup> | 0.59±0.07 <sup>***</sup> | 0.14±0.20 <sup>***</sup>  | 0.04±0.02 <sup>***</sup> |
| 6hr                  | 1.01±0.05 <sup>ns</sup>  | 0.90±0.06 <sup>***</sup> | 0.78±0.03 <sup>***</sup> | 0.64±0.06 <sup>***</sup> | 0.45±0.13 <sup>***</sup> | 0.09±0.04 <sup>***</sup>  | 0.02±0.00 <sup>***</sup> |
| 12hr                 | 1.03±0.05 <sup>ns</sup>  | 1.00±0.06 <sup>ns</sup>  | 0.81±0.06 <sup>***</sup> | 0.32±0.07 <sup>***</sup> | 0.32±0.03 <sup>***</sup> | 0.03±0.01 <sup>***</sup>  | 0.01±0.00 <sup>***</sup> |
| 24hr                 | 0.88±0.05 <sup>ns</sup>  | 0.81±0.08 <sup>***</sup> | 0.59±0.05 <sup>ns</sup>  | 0.28±0.07 <sup>*</sup>   | 0.28±0.07 <sup>*</sup>   | 0.01±0.01 <sup>***</sup>  | 0.00±0.00 <sup>***</sup> |
| <b><u>H1975</u></b>  |                          |                          |                          |                          |                          |                           |                          |
| 3hr                  | 1.02±0.13 <sup>ns</sup>  | 0.89±0.11 <sup>***</sup> | 0.68±0.08 <sup>***</sup> | 0.54±0.09 <sup>***</sup> | 0.24±0.04 <sup>***</sup> | 0.09±0.05 <sup>***</sup>  | 0.00±0.00 <sup>***</sup> |
| 6hr                  | 0.96±0.14 <sup>ns</sup>  | 0.89±0.09 <sup>*</sup>   | 0.56±0.06 <sup>***</sup> | 0.39±0.09 <sup>***</sup> | 0.21±0.08 <sup>***</sup> | 0.13±0.17 <sup>***</sup>  | 0.00±0.00 <sup>***</sup> |
| 12hr                 | 0.99±0.24 <sup>ns</sup>  | 1.07±0.24 <sup>ns</sup>  | 0.61±0.12 <sup>***</sup> | 0.18±0.08 <sup>***</sup> | 0.07±0.03 <sup>***</sup> | 0.00±0.00 <sup>***</sup>  | 0.00±0.00 <sup>***</sup> |
| 24hr                 | 1.02±0.12 <sup>ns</sup>  | 0.95±0.09 <sup>ns</sup>  | 0.32±0.03 <sup>ns</sup>  | 0.07±0.01 <sup>***</sup> | 0.05±0.02 <sup>***</sup> | 0.00±0.00 <sup>***</sup>  | 0.00±0.00 <sup>***</sup> |
| <b><u>HCC827</u></b> |                          |                          |                          |                          |                          |                           |                          |
| 3hr                  | 1.09±0.21 <sup>ns</sup>  | 0.98±0.12 <sup>ns</sup>  | 0.80±0.12 <sup>***</sup> | 0.74±0.08 <sup>***</sup> | 0.62±0.09 <sup>***</sup> | 0.42±0.20 <sup>***</sup>  | 0.13±0.07 <sup>***</sup> |
| 6hr                  | 0.95±0.03 <sup>***</sup> | 0.86±0.10 <sup>***</sup> | 0.69±0.10 <sup>***</sup> | 0.58±0.05 <sup>***</sup> | 0.42±0.06 <sup>***</sup> | 0.16±0.08 <sup>***</sup>  | 0.10±0.07 <sup>***</sup> |
| 12hr                 | 0.90±0.05 <sup>***</sup> | 0.84±0.04 <sup>***</sup> | 0.77±0.06 <sup>***</sup> | 0.68±0.07 <sup>***</sup> | 0.44±0.13 <sup>***</sup> | 0.12±0.07 <sup>***</sup>  | 0.02±0.01 <sup>***</sup> |

---

|      |                          |                          |                          |                          |                          |                          |                          |
|------|--------------------------|--------------------------|--------------------------|--------------------------|--------------------------|--------------------------|--------------------------|
| 24hr | 0.86±0.03 <sup>***</sup> | 0.76±0.05 <sup>***</sup> | 0.67±0.07 <sup>***</sup> | 0.51±0.11 <sup>***</sup> | 0.27±0.11 <sup>***</sup> | 0.09±0.05 <sup>***</sup> | 0.03±0.02 <sup>***</sup> |
|------|--------------------------|--------------------------|--------------------------|--------------------------|--------------------------|--------------------------|--------------------------|

---

**Fig. S1**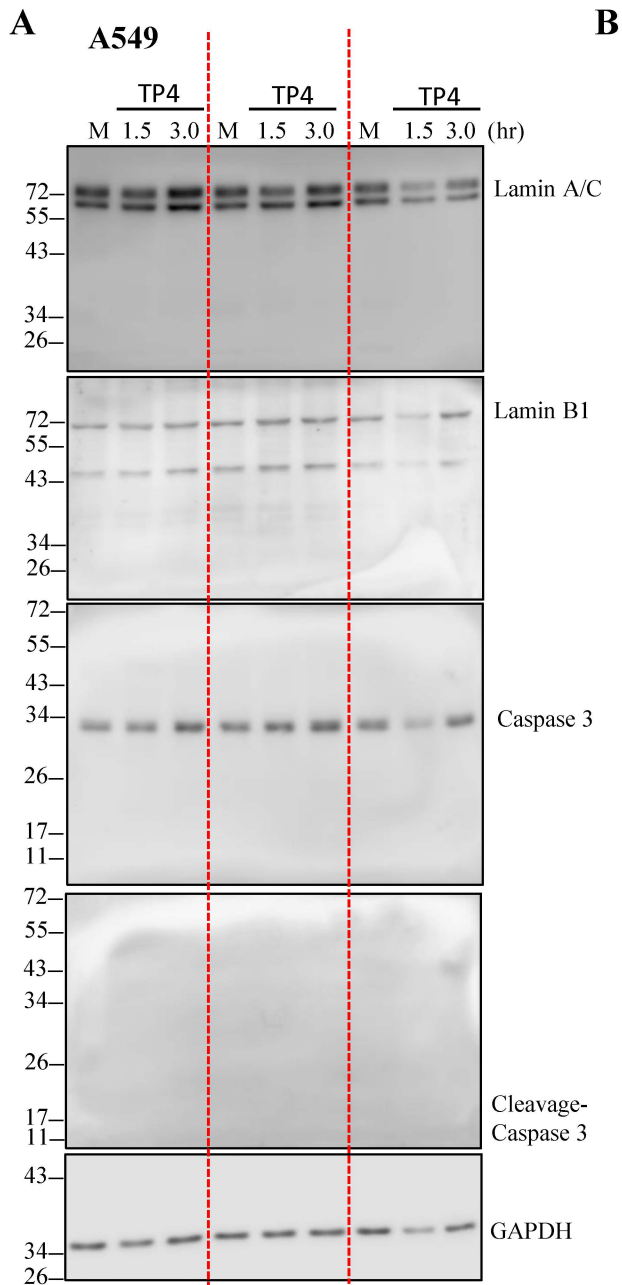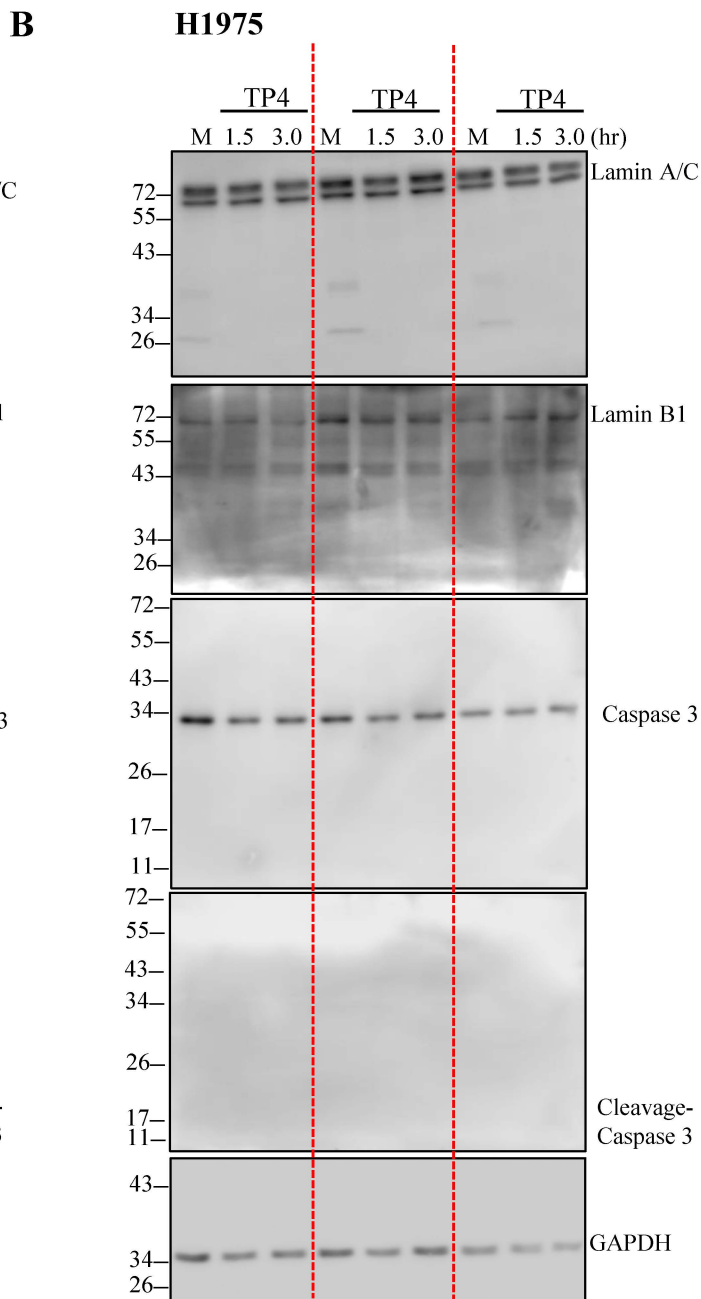

Supplement: marinedrugs-16-00506-s001.pdf [file marinedrugs-16-00506-s001.pdf]
